# Supplementary material for: Mechanical stimuli-induced multiple photophysical responsive AIEgens with high contrast properties
Source: Royal Society of Chemistry journal article supplement (doi:10.1039/d1cc06931d), 2022-01-01
Supplement: d1cc06931d1.pdf [file d1cc06931d1.pdf]

## Electronic Supplementary Information

### **Mechanical stimuli-induced multiple photophysical responsive AIEgens with high contrast property**

Jing Wang<sup>a</sup>, Bingbing Yue<sup>b</sup>, Xiaoyong Jia<sup>\*a</sup>, Ruirui Cao<sup>a</sup>, Xiling Niu<sup>a</sup>, Huimin Zhao<sup>a</sup>, Juntan Li<sup>a</sup>, Liangliang Zhu<sup>\*c</sup>

<sup>a</sup> Henan Key Laboratory of Photovoltaic Materials, Henan University, Kaifeng 475004, China

<sup>b</sup> School of Materials and Chemistry, University of Shanghai for Science and Technology, Shanghai 200093, China

<sup>c</sup> State Key Laboratory of Molecular Engineering of Polymers, Department of Macromolecular Science, Fudan University, Shanghai 200438, China

*\*Corresponding author*

*E-mail address:* jiaxiaoyong@henu.edu.cn, zhuliangliang@fudan.edu.cn

---

## Table of Contents

|                                                                                                                                            |                |
|--------------------------------------------------------------------------------------------------------------------------------------------|----------------|
| <b>Experimental Procedures</b>                                                                                                             | <b>3-4</b>     |
| General                                                                                                                                    | 3              |
| Materials                                                                                                                                  | 3              |
| Synthetic Details                                                                                                                          | 3              |
| <br><b>Additional Data</b>                                                                                                                 | <br><b>5-9</b> |
| <b>Figure S1.</b> Absorption and emission spectra of CNCF <sub>3</sub> DSB-OH after solvent treatment                                      | 5              |
| <b>Figure S2.</b> PXRD spectra after after solvent treatment                                                                               | 5              |
| <b>Figure S3.</b> Schematic illustration of the dipole-dipole interaction when aggregates formed                                           | 5              |
| <b>Figure S4.</b> The absorption and emission spectra of CNCF <sub>3</sub> DSB-OH treated with NH <sub>3</sub> ·H <sub>2</sub> O           | 6              |
| <b>Figure S5.</b> Absorption and emission stimulation cycles with addition of base/acid                                                    | 6              |
| <b>Figure S6.</b> Images in different solvents after added NH <sub>3</sub> ·H <sub>2</sub> O                                               | 6              |
| <b>Figure S7.</b> Illustration molecular structure of reference compounds.                                                                 | 6              |
| <b>Figure S8.</b> PXRD spectra of reference compounds after mechanical force                                                               | 7              |
| <b>Figure S9.</b> Images of reference compounds after mechanical force under 365 nm                                                        | 7              |
| <b>Figure S10.</b> Images of reference compounds after mechanical force under daylight                                                     | 7              |
| <b>Figure S11.</b> Absorption and emission spectra of reference compounds before and after grinding                                        | 8              |
| <b>Figure S12.</b> Absorption and emission spectra of CNCF <sub>3</sub> DSB-OCH <sub>3</sub> after added NH <sub>3</sub> ·H <sub>2</sub> O | 8              |
| <b>Figure S13.</b> Absorption and emission spectra of CNCH <sub>3</sub> DSB-OH after added NH <sub>3</sub> ·H <sub>2</sub> O               | 8              |
| <b>Figure S14.</b> Absorption and emission spectra of CNDSB-OH after added NH <sub>3</sub> ·H <sub>2</sub> O                               | 9              |
| <b>Figure S15.</b> FTIR spectra changes of hydroxyl group before and after grinding                                                        | 9              |
| <b>Figure S16.</b> Images of PVA films prepared from DMSO and H <sub>2</sub> O solution                                                    | 9              |
| <br><b>Appendix</b>                                                                                                                        |                |
| <sup>1</sup> H NMR , <sup>13</sup> C NMR spectra                                                                                           | 10-13          |

## 1. General Experimental Details

**General.**  $^1\text{H}$  NMR and  $^{13}\text{C}$  NMR spectra were measured on a Bruker 400L spectrometer. The UV-vis absorption spectra were recorded on a Cary 5000 spectrophotometer. The emission spectra were recorded on FLS 1000 (Edinburgh Instruments). Transmission electron microscopy (TEM) was performed on a Jeol JEM 2100 with an accelerating voltage of 200 kV. High-resolution mass spectrometry data was measured on a TripleTOF 4600 and high-resolution time-of-flight mass spectrometer. Fourier transform infrared spectroscopy (FT-IR) was performed on Bruker VERTEX 70. Dynamic Light Scattering (DLS) experiments were carried out with Nano-Zeta Potential Analyzer ZS-90. Powder X-Ray diffraction (PXRD) patterns were obtained by using  $\text{CuK}\alpha$  radiation (Bruker, D8-ADVANCE).

**Materials.** 2-Hydroxyisophthalaldehyde, 2-Methoxyisophthalaldehyde, 4-(Trifluoromethyl)phenylacetonitrile, Benzyl cyanide, 4-Methylbenzyl cyanide, Sodium Ethoxide ( $\text{EtONa}$ ) were commercially available from Beijing Hwrkchemical. Tetrabutylammonium Hydroxide (TBAOH) (25% w/w in methanol), N,N-Dimethylformamide (DMF), Acetic Acid, Petroleum ether, Ethanol, Tetrahydrofuran (THF), were commercially available from Adamas. All reagents were of analytical or reagent grades and used without further purification. Deionized water ( $18.2\text{ M}\Omega\cdot\text{cm}$ ) was obtained from a F'DEER water purification system.

### Synthetic Details

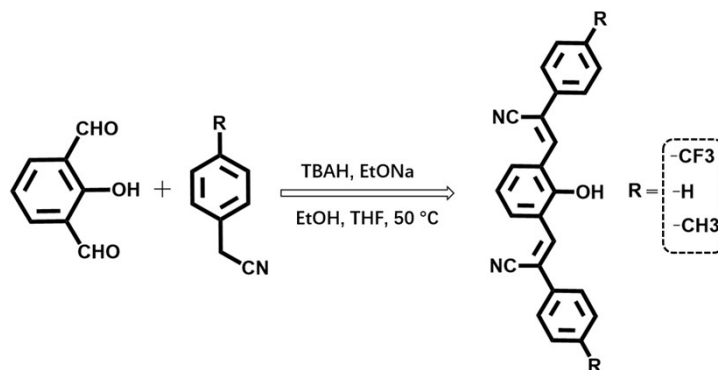

**Scheme S1 Synthetic route for compound in the work**

**Synthesis of compound  $\text{CNCF}_3\text{DSB-OH}$ :** 2-Hydroxyisophthalaldehyde (0.15 g, 1 mmol, 1.00 eq.) and 4-(Trifluoromethyl)phenylacetonitrile (0.37 g, 2 mmol, 2.0 eq.) were added into a round bottom flask capped with a septum under nitrogen atmosphere. Dry ethanol (20 mL) and THF (2 mL) was injected via a syringe and the mixture was stirred at 50 °C for 1 h. Tetrabutylammonium Hydroxide (1 mL), Sodium Ethoxide (0.34 g, 5 mmol, 5.00 eq.) in 5ml ethanol was added into the flask and stirred at 50 °C for 4 h. After cooling to room temperature, acetic acid in ethanol was added to adjust the solution to weak acidity. After collecting the solid by filtration, it was rinsed with ethanol (10 mL), diethyl ether (20 mL), and then dried under high vacuum. The crude product was purified by recrystallization in ethanol to afford white compound  $\text{CNCF}_3\text{DSB-OH}$  (Yield, 46.8%).  $^1\text{H}$  NMR (400 MHz, DMSO, 298 K):  $\delta$  = 9.33 (s, 1H), 8.08-8.10 (d, 4H), 8.06-8.07 (d, 2H), 7.98-9.00 (d, 4H), 7.52 (s, 2H), 6.68-6.70 (t, 1H).  $^{13}\text{C}$  NMR (100 MHz, DMSO, 298 K):  $\delta$  = 103.75, 116.08, 118.11, 120.03, 125.69, 127.12,

---

129.05, 131.20, 134.54, 141.76, 149.35, 156.33. MS(TOF-MS, m/z): MS(ESI<sup>+</sup>, m/z): 483[M-H]<sup>-</sup>, 519[M+Cl]<sup>-</sup>, 529[M+HCOO]<sup>-</sup>.

**Synthesis of compound CNDSB-OH:** The synthesis of CNDSB-OH was achieved according to the protocol of the synthesis of CNCF<sub>3</sub>DSB-OH. Yellow solid was acquired in 39% yield. <sup>1</sup>H NMR (400 MHz, DMSO, 298 K): δ = 8.06-8.08 (d, 4H), 7.90 (t, 4H), 7.87-7.88 (t, 2H), 7.85-7.86 (d, 2H), 7.55 (s, 2H), 6.71-6.75 (t, 1H), 5.71 (s, 1H). <sup>13</sup>C NMR (100 MHz, DMSO, 298 K): δ = 101.91, 117.99, 120.76, 123.38, 129.52, 130.02, 130.71, 131.49, 138.88, 145.82, 153.64. MS(ESI<sup>+</sup>, m/z): 347[M-H]<sup>-</sup>, 383[M+Cl]<sup>-</sup>, 393[M+HCOO]<sup>-</sup>.

**Synthesis of compound CNCH<sub>3</sub>DSB-OH:** The synthesis of CNCH<sub>3</sub>DSB-OH was achieved according to the protocol of the synthesis of CNCF<sub>3</sub>DSB-OH. Yellow solid was acquired in 36% yield. <sup>1</sup>H NMR (400 MHz, DMSO, 298 K): 8.12-8.14 (d, 4H), 8.09 (d, 4H), 7.99-8.02 (d, 2H), 7.56 (s, 2H), 6.72-6.75 (t, 1H), 5.70 (s, 1H), 2.18 (s, 6H). <sup>13</sup>C NMR (100 MHz, DMSO, 298 K): δ = 25.36, 101.60, 117.67, 120.43, 123.15, 130.51, 134.26, 137.49, 138.61, 142.85, 145.63, 153.53. MS(ESI<sup>+</sup>, m/z): 375[M-H]<sup>-</sup>, 411[M+Cl]<sup>-</sup>, 421[M+HCOO]<sup>-</sup>.

**Synthesis of compound CNCF<sub>3</sub>DSB-OCH<sub>3</sub>:** The synthesis of CNCF<sub>3</sub>DSB-OCH<sub>3</sub> was achieved according to the protocol of the synthesis of CNCF<sub>3</sub>DSB-OH. White solid was acquired in 53% yield. <sup>1</sup>H NMR (400 MHz, DMSO, 298 K): δ = 8.07-8.09 (d, 2H), 8.03-8.04 (d, 4H), 8.01-8.02 (d, 4H), 7.51 (s, 2H), 7.03-7.04 (t, 1H), 3.05 (s, 3H). <sup>13</sup>C NMR (100 MHz, DMSO, 298 K): δ = 63.21, 103.76, 116.50, 118.33, 120.02, 125.68, 127.12, 129.04, 131.19, 134.53, 141.74, 149.34, 156.94. MS(ESI<sup>+</sup>, m/z): 499[M+H]<sup>+</sup>, 521[M+Na]<sup>+</sup>, 537[M+K]<sup>+</sup>.

## 2. Additional Data

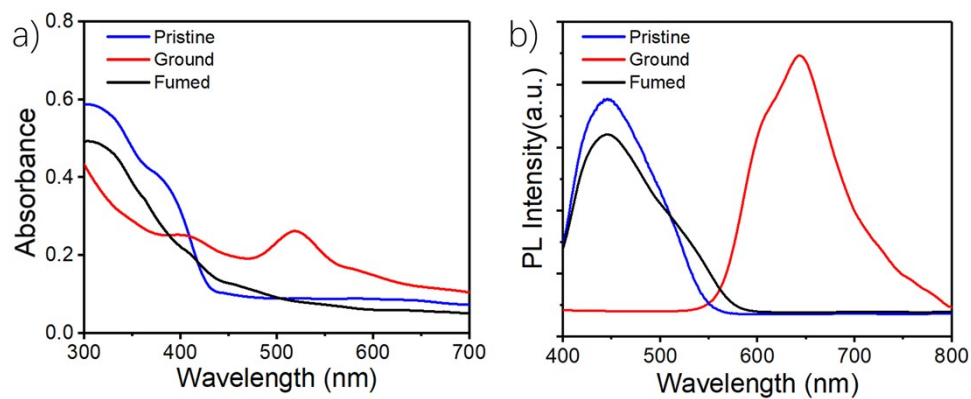

**Figure S1** (a) UV-vis absorption and (b) emission spectra of CNCF<sub>3</sub>DSB-OH in solid state after ground and solvent treatment using CHCl<sub>3</sub>

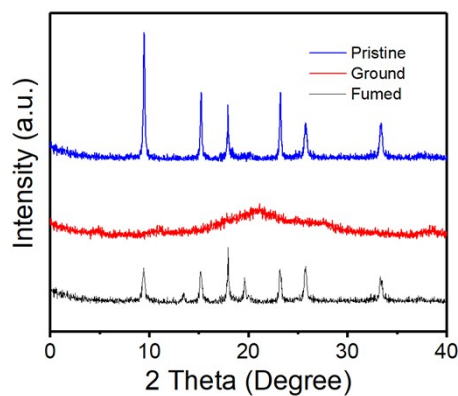

**Figure S2** PXRD spectra of CNCF<sub>3</sub>DSB-OH in solid state before and after ground, followed by solvent treatment using CHCl<sub>3</sub>

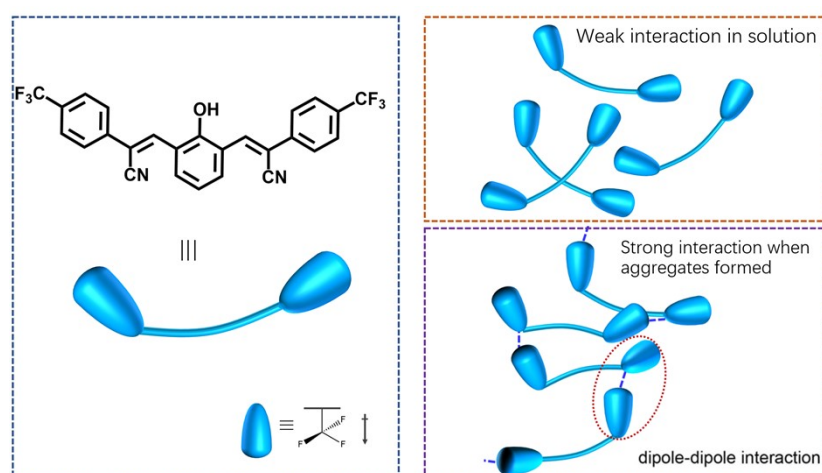

**Figure S3** Schematic illustration of the dipole-dipole interaction when aggregates formed.

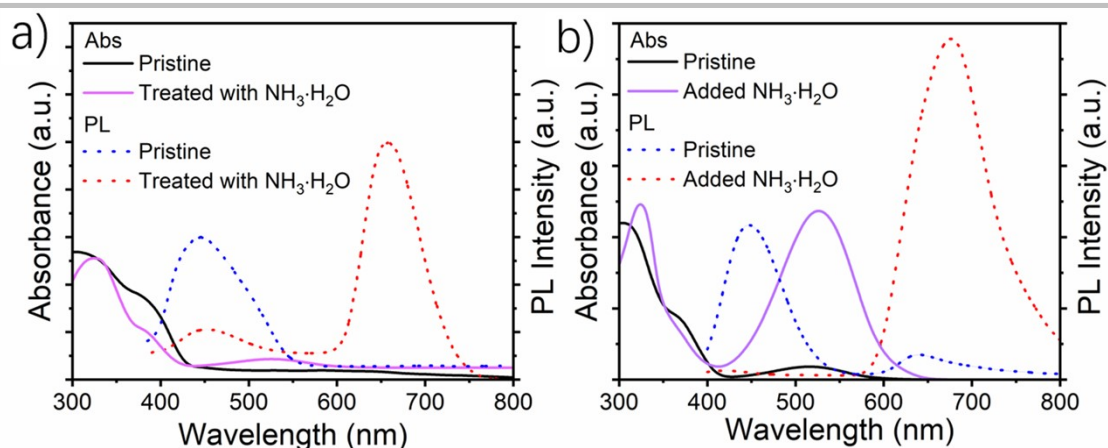

**Figure S4** (a) The absorption and emission spectra of CNCF<sub>3</sub>DSB-OH in solid state before and after being treated with NH<sub>3</sub>·H<sub>2</sub>O vapor. (b) Absorption and emission spectra of CNCF<sub>3</sub>DSB-OH in C<sub>2</sub>H<sub>5</sub>OH before and after the addition of NH<sub>3</sub>·H<sub>2</sub>O.

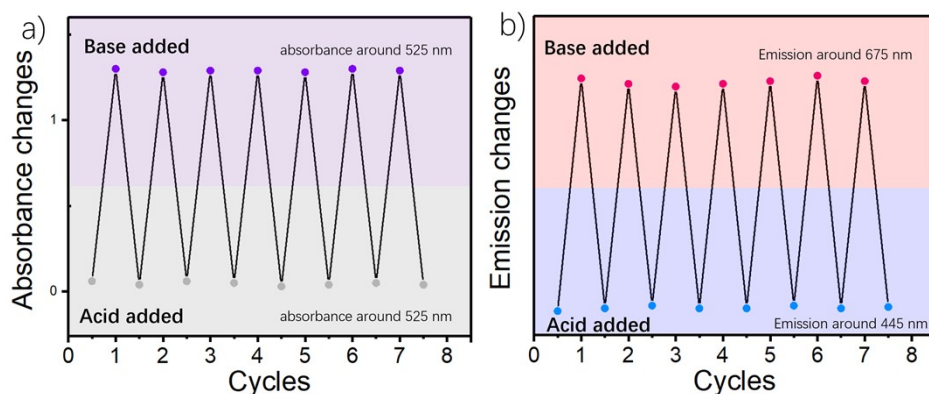

**Figure S5** (a) Absorption and (b) emission stimulation cycles with addition of base/acid in in C<sub>2</sub>H<sub>5</sub>OH.

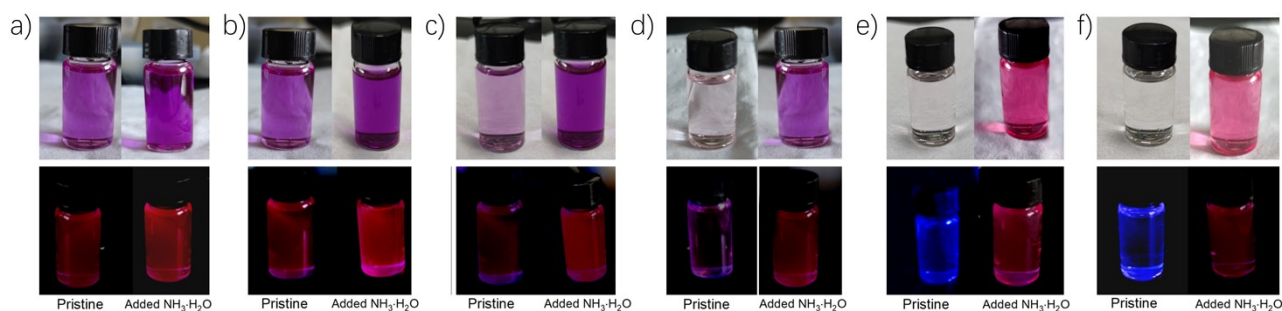

**Figure S6.** Images of color (top) and luminescence (bottom) in different solvents before and after added NH<sub>3</sub>·H<sub>2</sub>O. (a) DMF, (b) DMSO, (c) CH<sub>3</sub>CN, (d) THF, (e) CH<sub>2</sub>Cl<sub>2</sub>, (f) Toluene

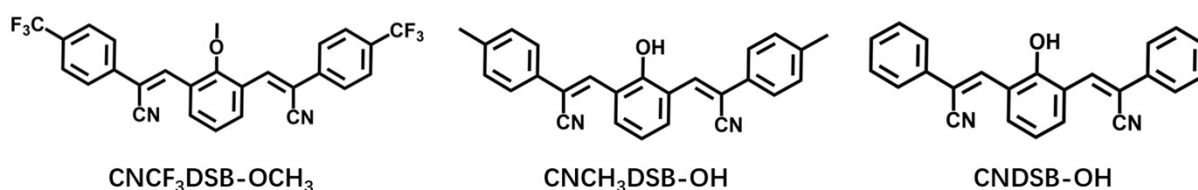

**Figure S7.** Illustration molecular structure of reference compounds.

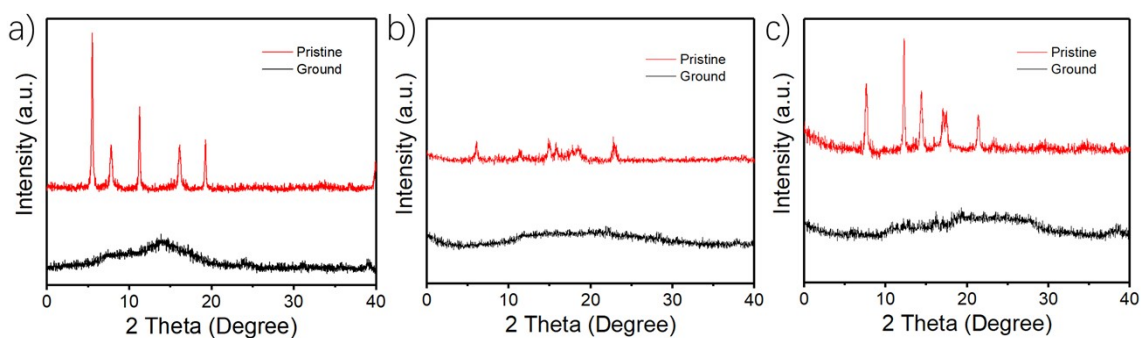

**Figure S8.** PXRD spectra of reference compounds before and after mechanical force. (a)  $\text{CNCF}_3\text{DSB-OCH}_3$ , (b)  $\text{CNCH}_3\text{DSB-OH}$ , (c)  $\text{CNDSB-OH}$

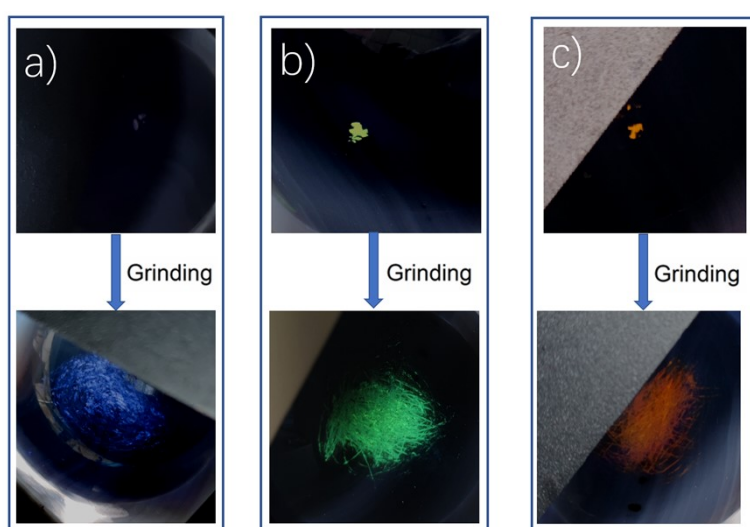

**Figure S9** Images of reference compounds before and after mechanical force under 365 nm.

(a)  $\text{CNCF}_3\text{DSB-OCH}_3$ , (b)  $\text{CNCH}_3\text{DSB-OH}$ , (c)  $\text{CNDSB-OH}$

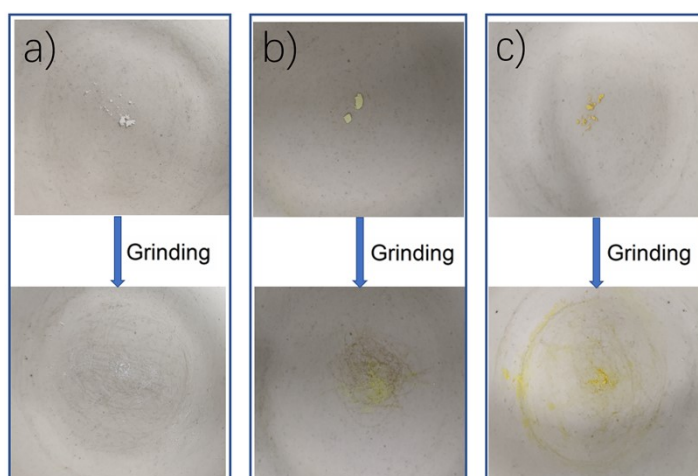

**Figure S10** Images of reference compounds before and after mechanical force under daylight.

(a)  $\text{CNCF}_3\text{DSB-OCH}_3$ , (b)  $\text{CNCH}_3\text{DSB-OH}$ , (c)  $\text{CNDSB-OH}$

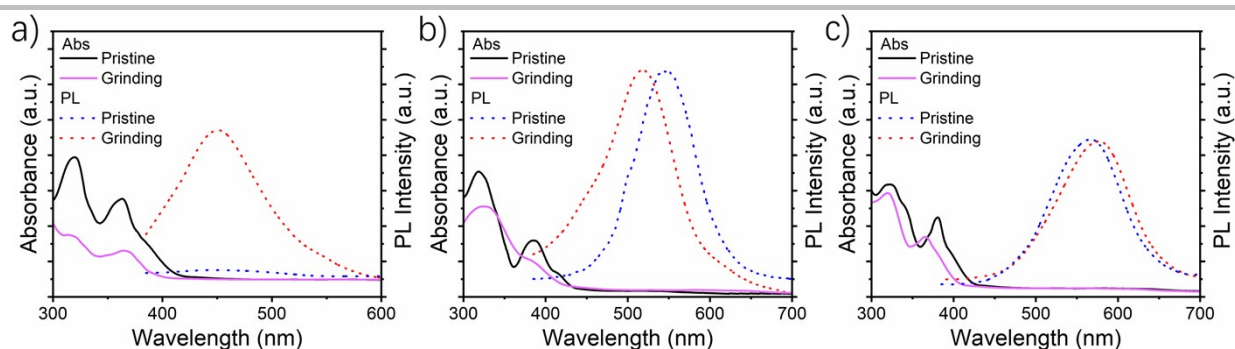

**Figure S11** Absorption and emission spectra of reference compounds in solid state before and after grinding. (a) CNCF<sub>3</sub>DSB-OCH<sub>3</sub>, (b) CNCH<sub>3</sub>DSB-OH, (c) CNDSB-OH

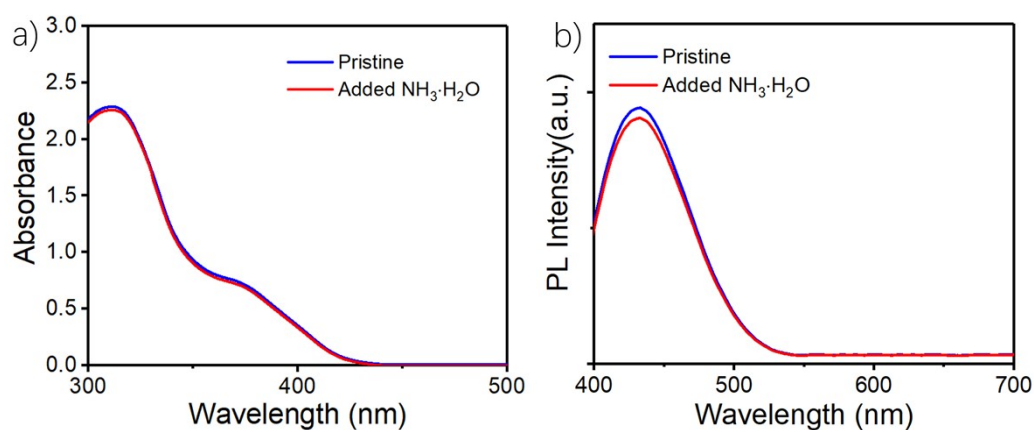

**Figure S12** (a) UV-vis absorption and (b) emission spectra of CNCF<sub>3</sub>DSB-OCH<sub>3</sub> before and after added NH<sub>3</sub>·H<sub>2</sub>O. These measurements were performed at room temperature with the concentration of CNCF<sub>3</sub>DSB-OCH<sub>3</sub>  $1.0 \times 10^{-4}$  M.

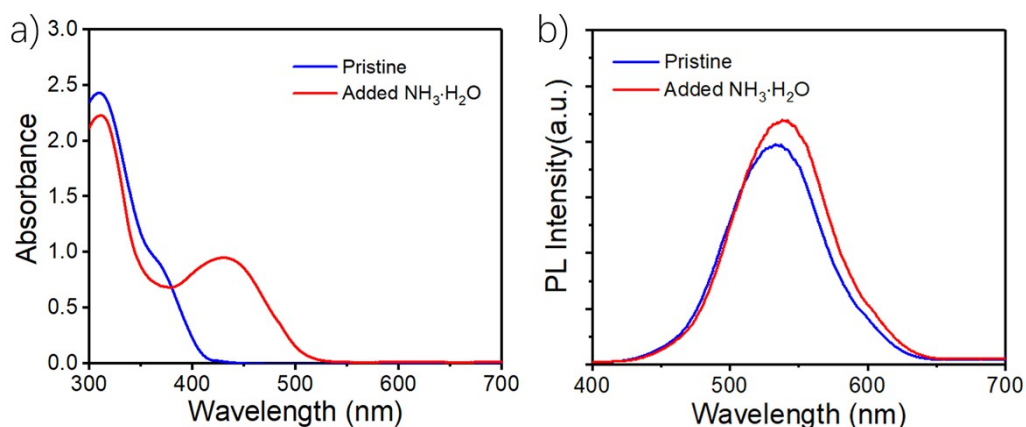

**Figure S13** (a) UV-vis absorption and (b) emission spectra of CNCH<sub>3</sub>DSB-OH before and after added NH<sub>3</sub>·H<sub>2</sub>O. These measurements were performed at room temperature with the concentration of CNCH<sub>3</sub>DSB-OH  $1.0 \times 10^{-4}$  M.

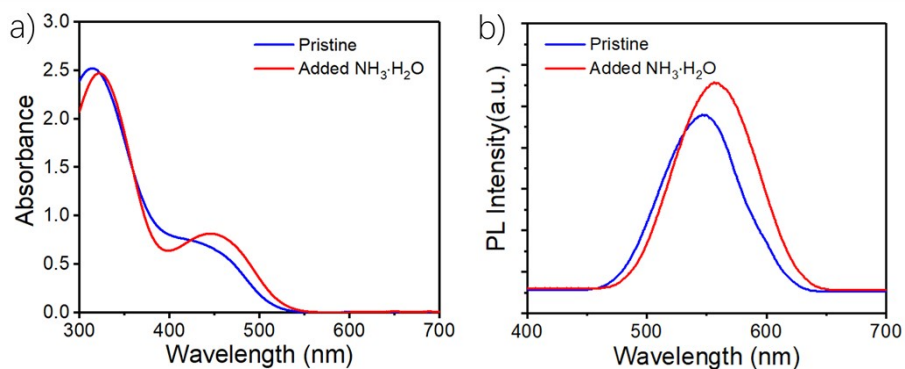

**Figure S14** (a) UV-vis absorption and (b) emission spectra of CNDSB-OH before and after added  $\text{NH}_3\cdot\text{H}_2\text{O}$ . These measurements were performed at room temperature with the concentration of CNDSB-OH  $1.0 \times 10^{-4}$  M.

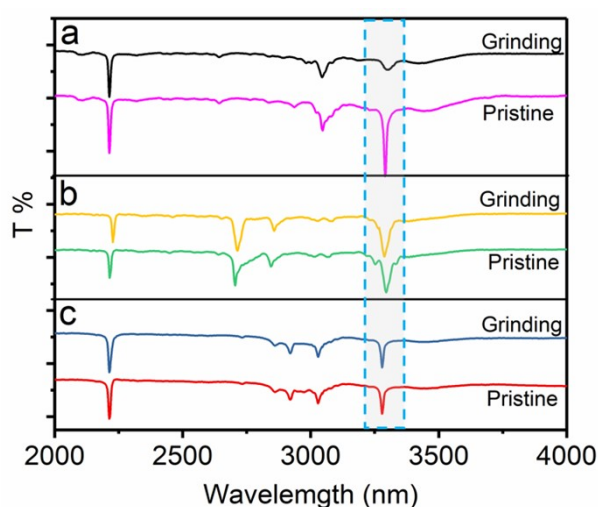

**Figure S15** FTIR spectra changes of hydroxyl group before and after grinding. (a)  $\text{CNCF}_3\text{DSB-OH}$ , (b)  $\text{CNCH}_3\text{DSB-OH}$ , (c)  $\text{CNDSB-OH}$

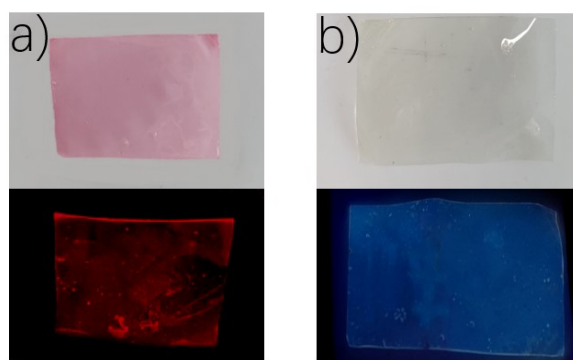

**Figure S16** Images of color (top) and luminescence (bottom) in PVA films prepared from (a) DMSO and (b)  $\text{H}_2\text{O}$  solution.  $\text{CNCF}_3\text{DSB-OH}$  and PVA can dissolve well in DMSO solution, and the film prepared from their DMSO solution can display light red color and red luminescence, impaling that the molecules are in a dispersed state in PVA.  $\text{CNCF}_3\text{DSB-OH}$  can form aggregates in  $\text{H}_2\text{O}$  solution, and the film prepared from the  $\text{H}_2\text{O}$  solution can display colorless and blue luminescence, impaling that the molecules are in aggregated state in PVA.

## Appendix

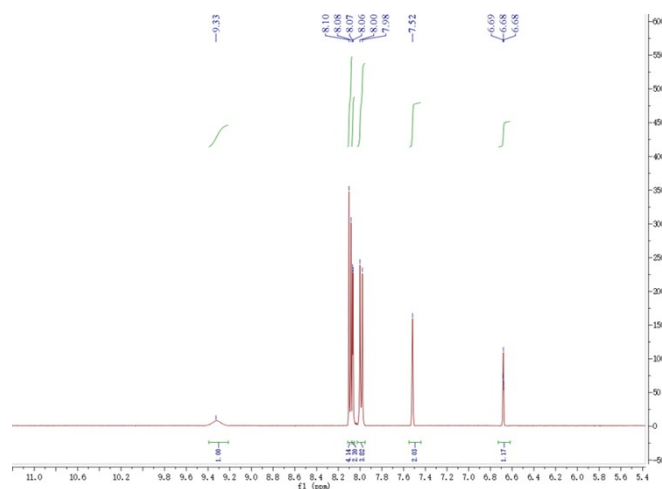

Figure S17  $^1\text{H}$  NMR spectrum of  $\text{CNCF}_3\text{DSB-OH}$

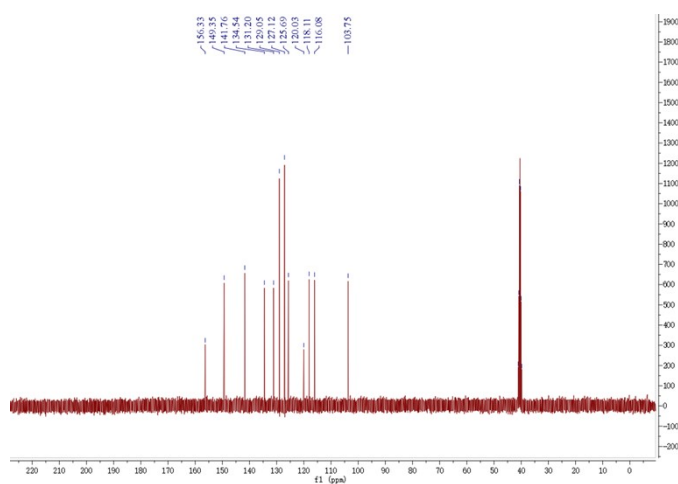

Figure S18  $^{13}\text{C}$  NMR spectrum of  $\text{CNCF}_3\text{DSB-OH}$

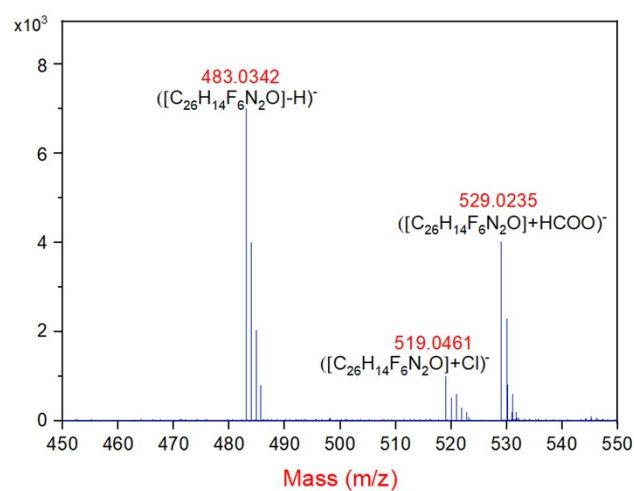

Figure S19 High-resolution mass spectrum spectrum of  $\text{CNCF}_3\text{DSB-OH}$  in methanol

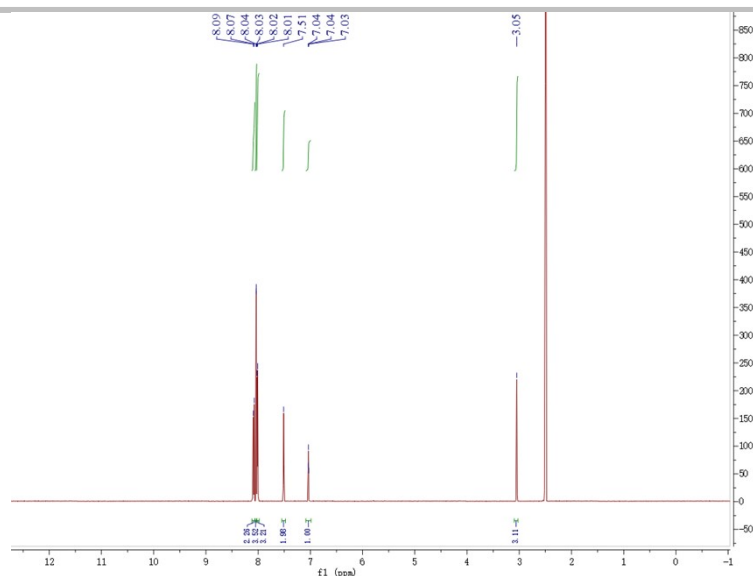

Figure S20  $^1\text{H}$  NMR spectrum of  $\text{CNCF}_3\text{DSB-OCH}_3$

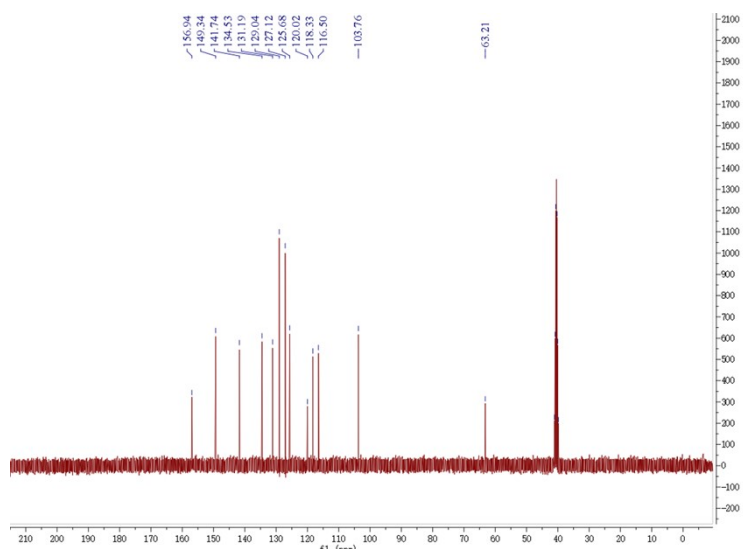

Figure S21  $^{13}\text{C}$  NMR spectrum of  $\text{CNCF}_3\text{DSB-OCH}_3$

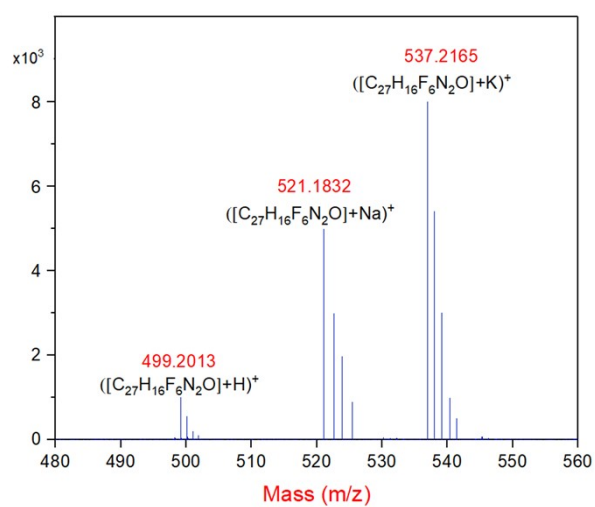

Figure S22 High-resolution mass spectrum spectrum of  $\text{CNCF}_3\text{DSB-OCH}_3$  in methanol

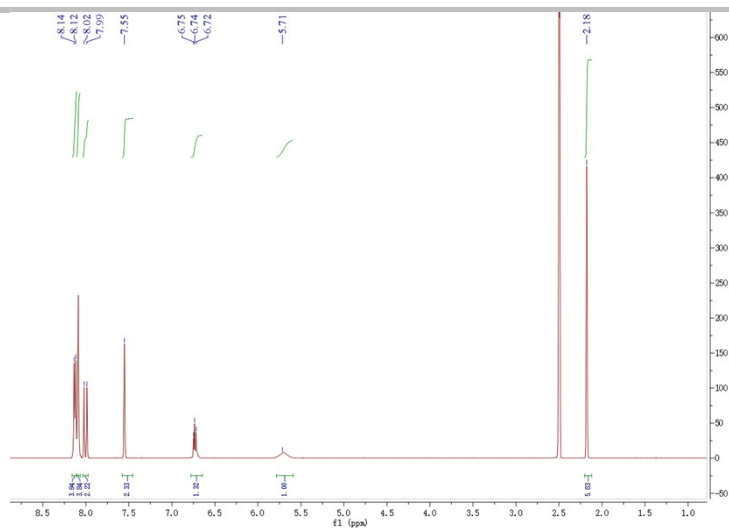

Figure S23  $^1\text{H}$  NMR spectrum of  $\text{CNCH}_3\text{DSB-OH}$

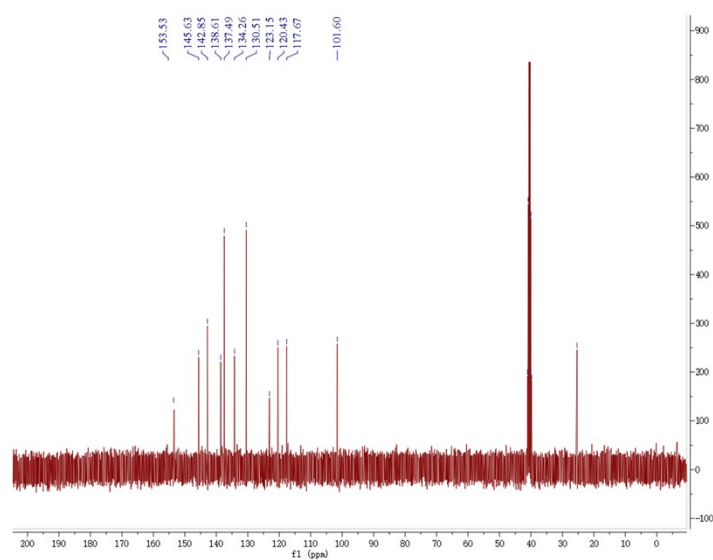

Figure S24  $^{13}\text{C}$  NMR spectrum of  $\text{CNCH}_3\text{DSB-OH}$

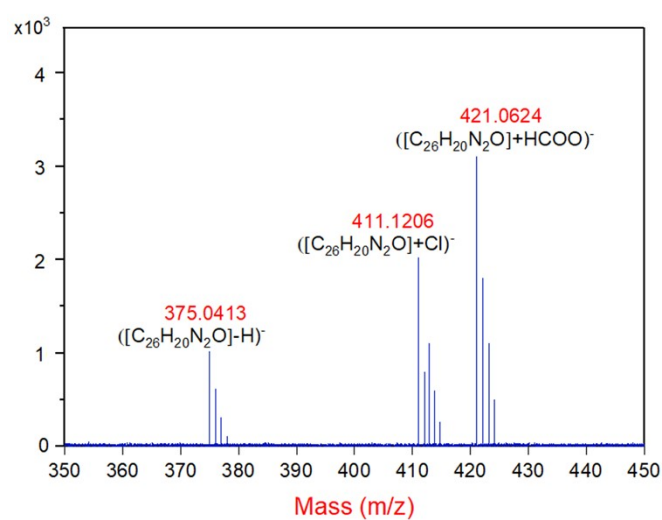

Figure S25 High-resolution mass spectrum spectrum of  $\text{CNCH}_3\text{DSB-OH}$  in methanol

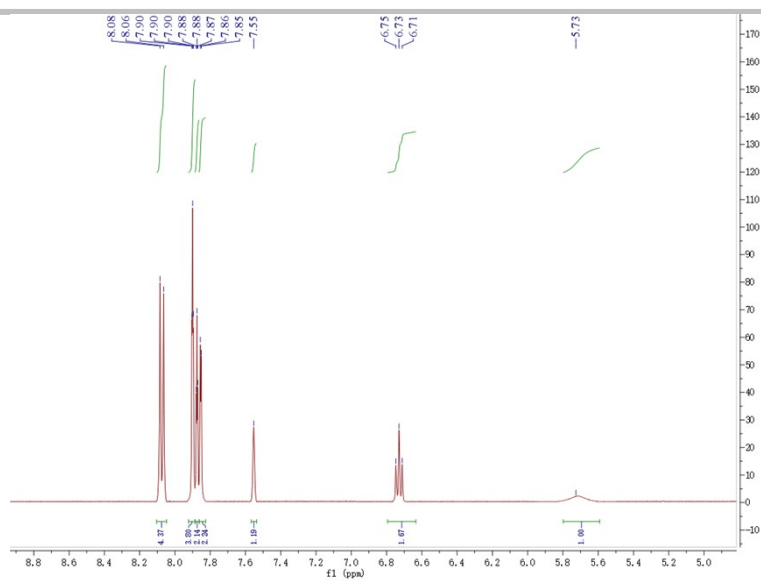

**Figure S26**  $^1\text{H}$  NMR spectrum of CNDSB-OH

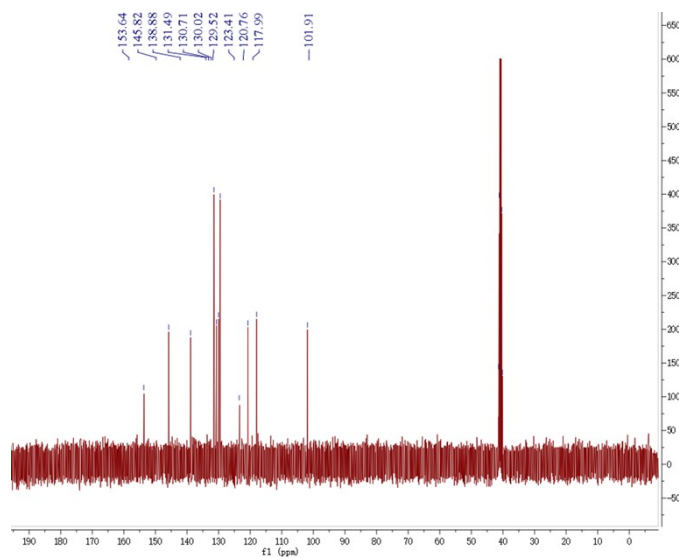

**Figure S27**  $^{13}\text{C}$  NMR spectrum of CNDSB-OH

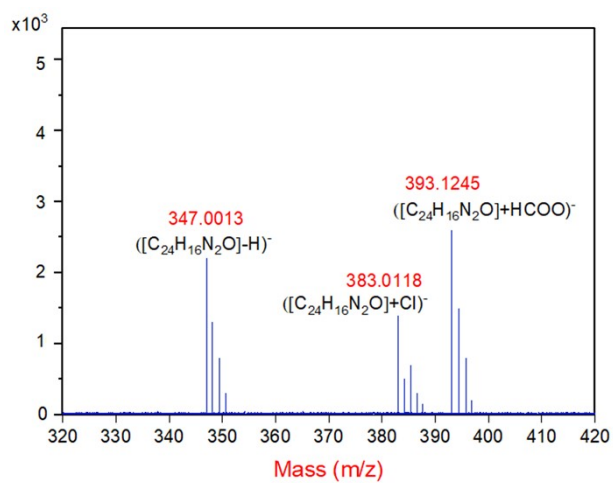

**Figure S28** High-resolution mass spectrum spectrum of CNDSB-OH in methanol
